# Supplementary material
Source: publisher figshare collection journal article supplement (https://gsajournals.figshare.com/articles/dataset/_/15018981)

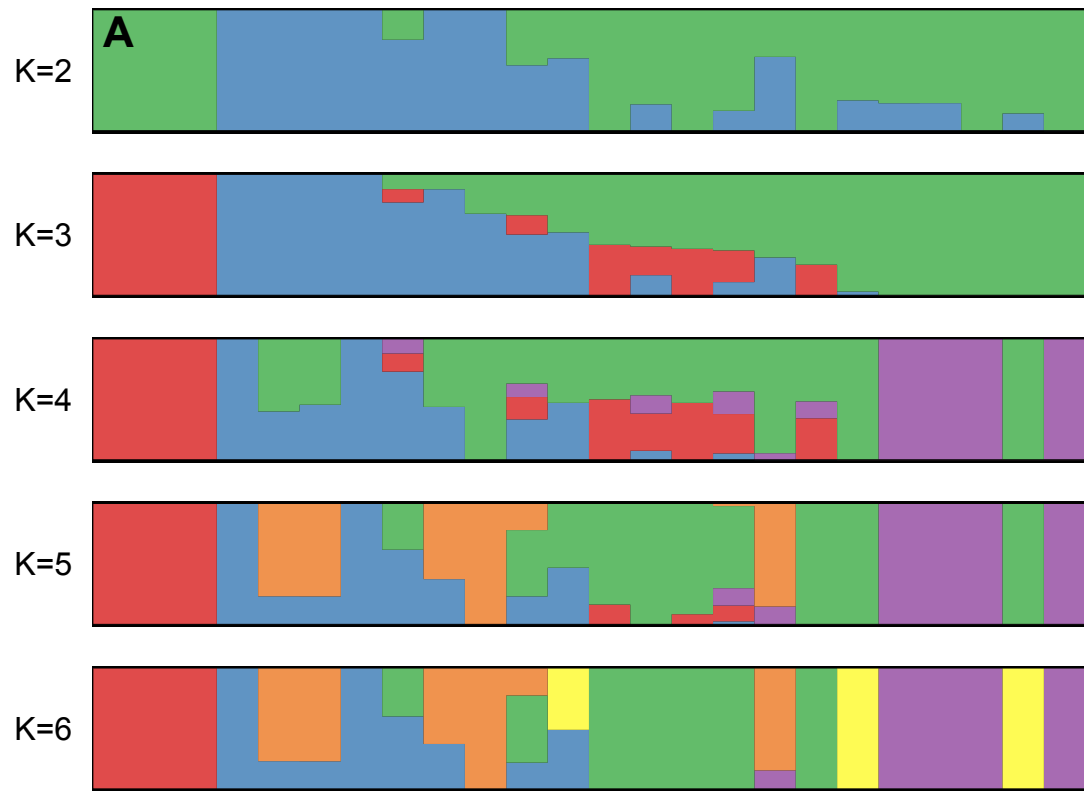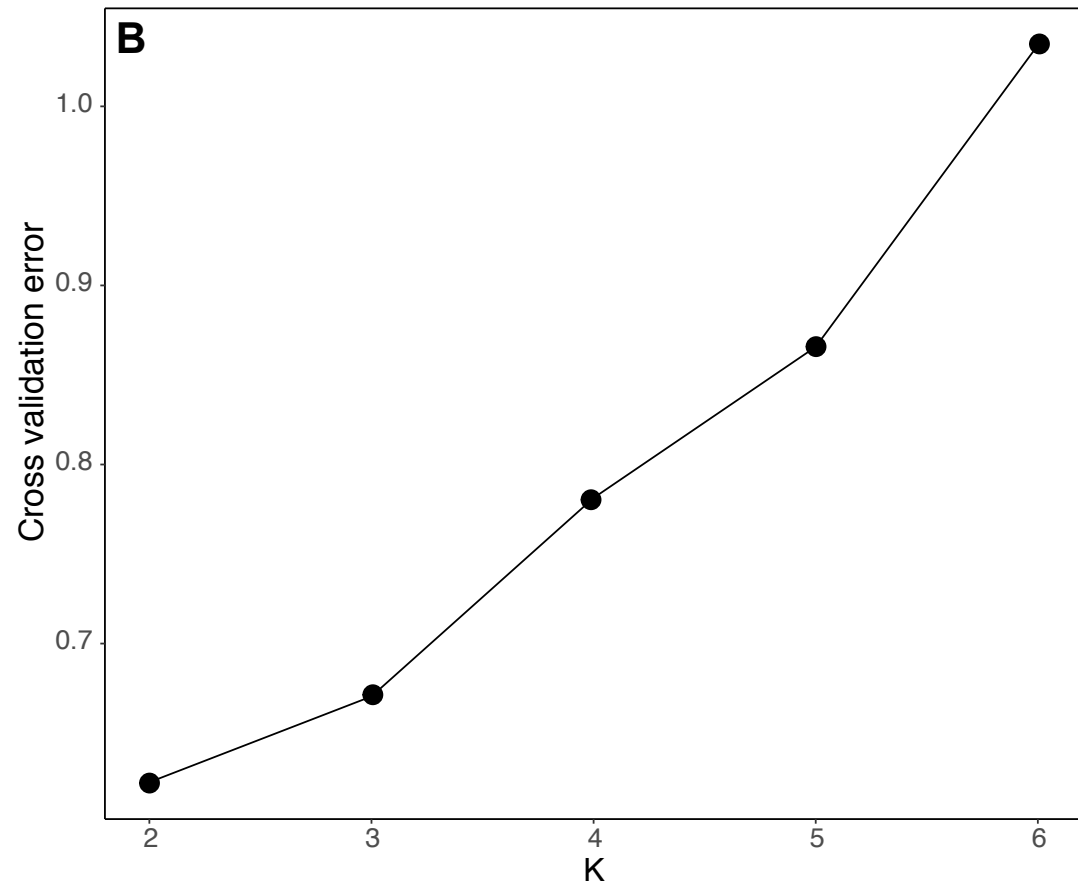

Supplement: Supplementary file 1 [file 1]

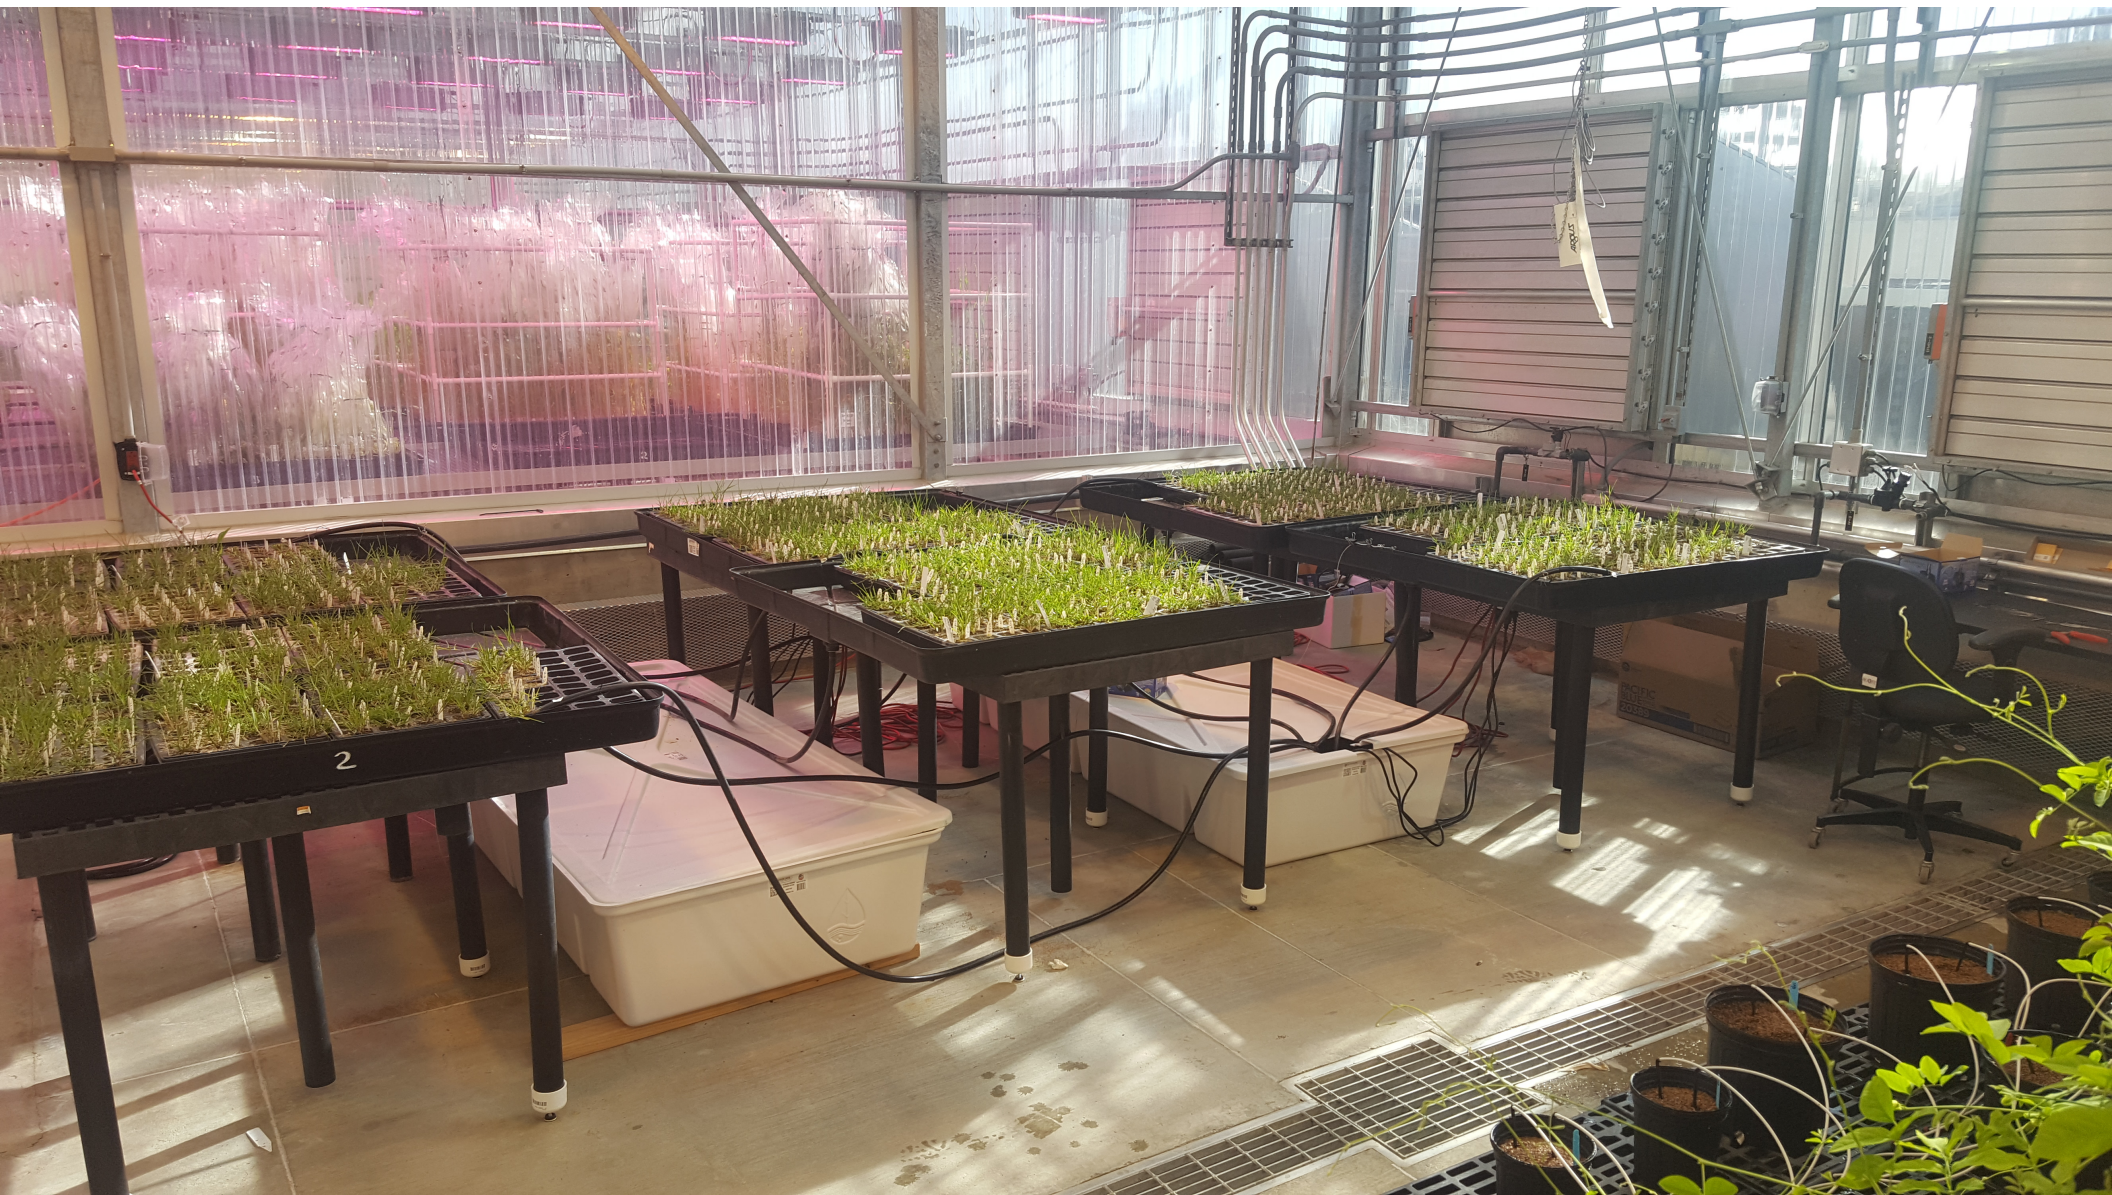

Supplement: Supplementary file 2 [file 1]

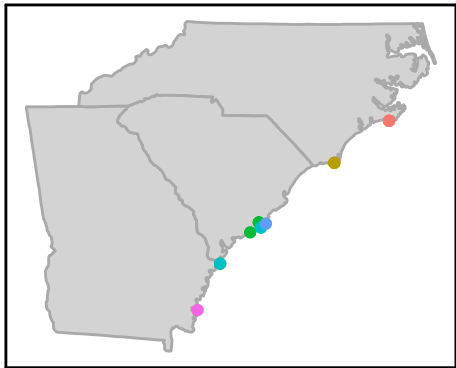

## Genotype ID

- fine\_05
- fine\_06
- fine\_07
- fine\_08
- fine\_20
- fine\_21

Supplement: Supplementary file 3 [file 1]

**B**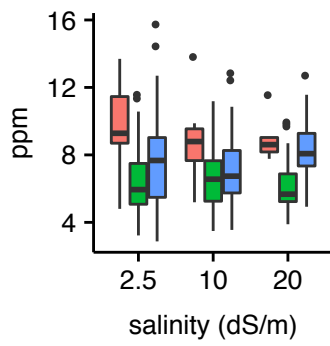**Na**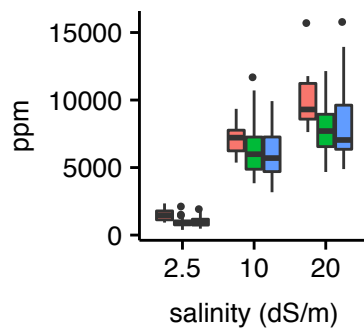**Mg**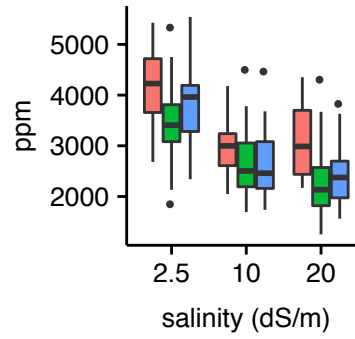**P**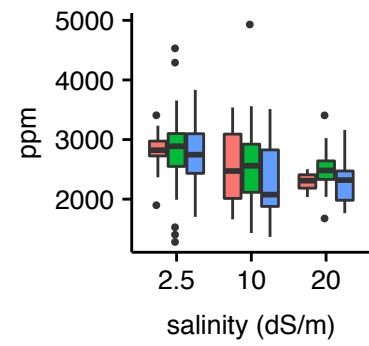**S**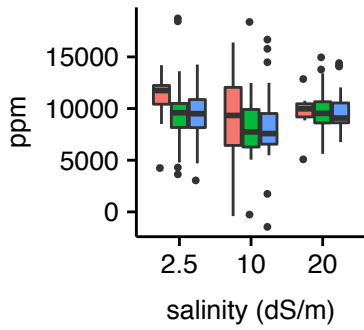**K**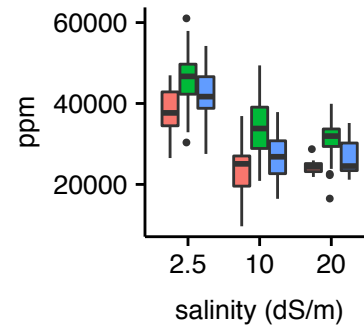**Ca**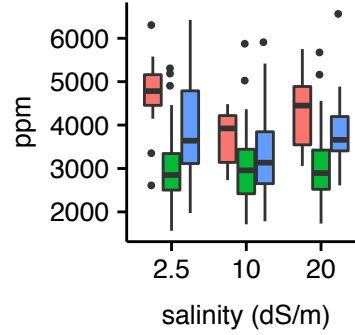**Fe**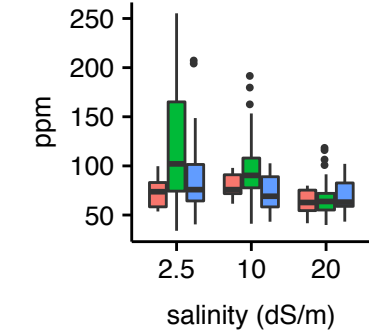**Mn**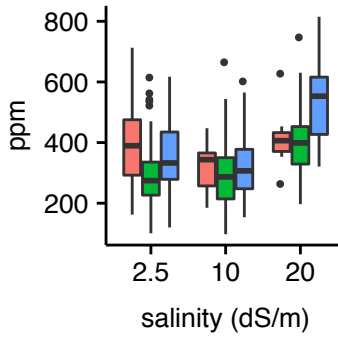**Co**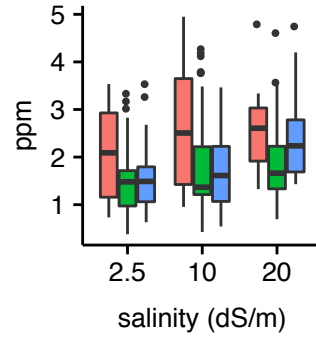**Ni**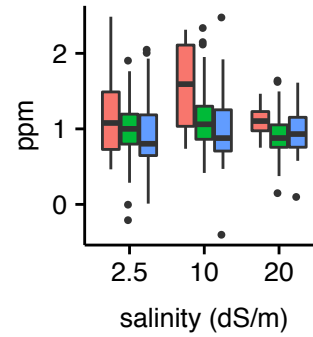**Cu**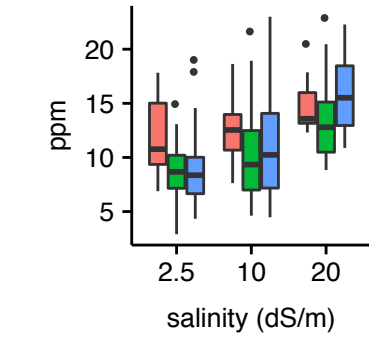**Zn**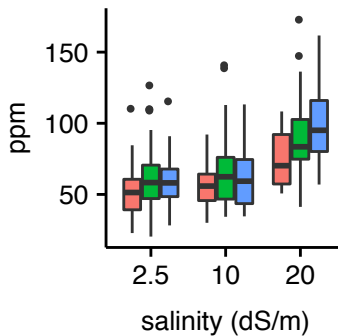**As**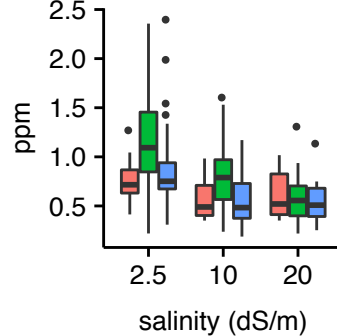**Se**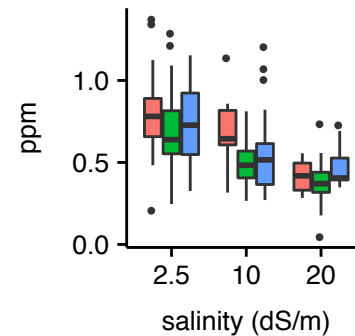**Rb**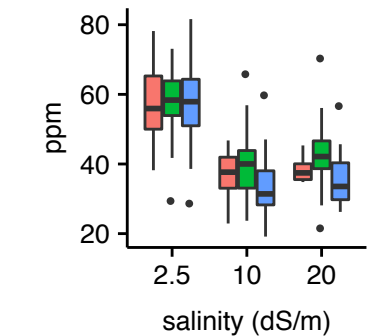**Sr**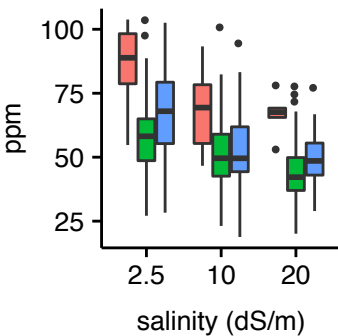**Mo**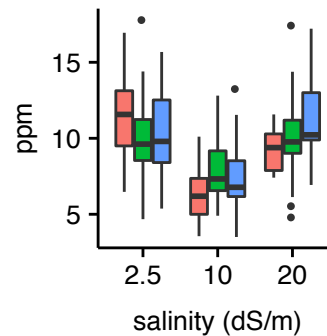**Cd**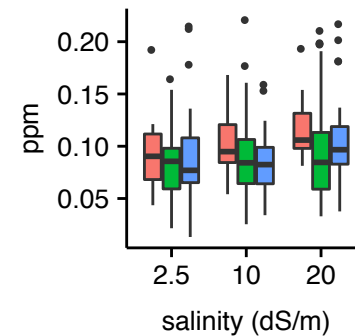**Biomass**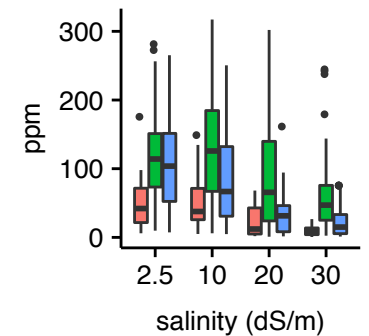

Supplement: Supplementary file 4 [file 1]

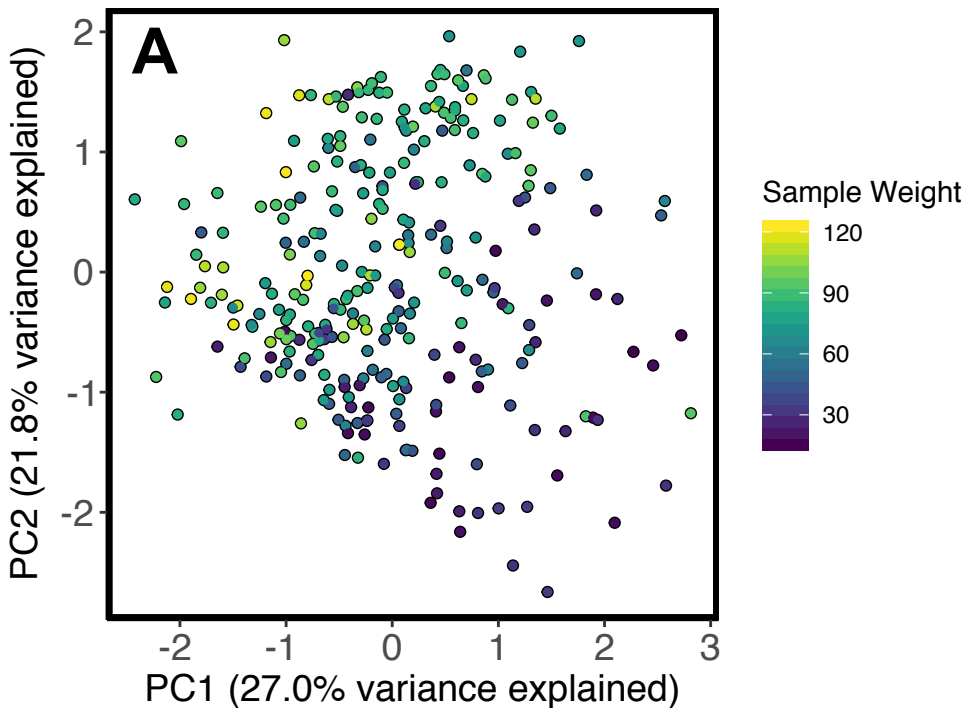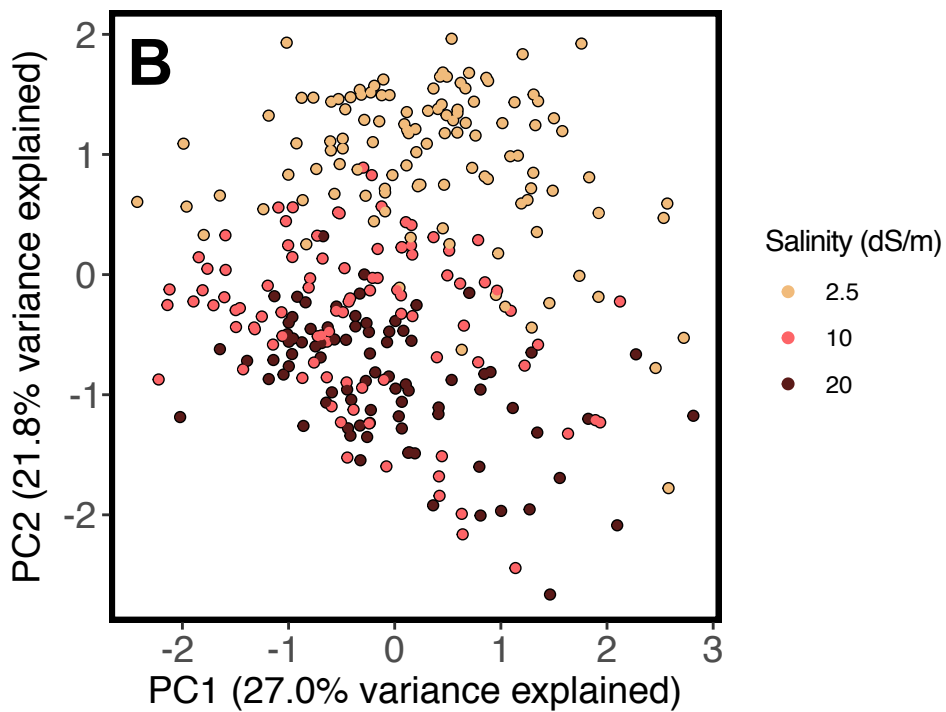

Supplement: Supplementary file 5 [file 1]
